# Supplementary material
Source: Elsevier journal article supplement (https://www.sciencedirect.com/science/article/pii/S2341192916300075)
Supplement: mmc1 [file S2341192916300075:mmc1.pdf]

## Material suplementario: Protocolos de consenso del Grupo Español de Rehabilitación Multimodal

Tabla 1: Protocolo de consenso del Grupo Español de Rehabilitación Multimodal para Cirugía de Colon

| Tiempo                                                          | Protocolo                                                                                                                                                                                                                                                                                                                                                                                                                                                                                                                                                                                                                                                                                                                                                                                                                                                                                                                                                                                                                                                                                                                                                                                                                                                                                                                                                                                                                                                                                                                                                                                                                                   |
|-----------------------------------------------------------------|---------------------------------------------------------------------------------------------------------------------------------------------------------------------------------------------------------------------------------------------------------------------------------------------------------------------------------------------------------------------------------------------------------------------------------------------------------------------------------------------------------------------------------------------------------------------------------------------------------------------------------------------------------------------------------------------------------------------------------------------------------------------------------------------------------------------------------------------------------------------------------------------------------------------------------------------------------------------------------------------------------------------------------------------------------------------------------------------------------------------------------------------------------------------------------------------------------------------------------------------------------------------------------------------------------------------------------------------------------------------------------------------------------------------------------------------------------------------------------------------------------------------------------------------------------------------------------------------------------------------------------------------|
| Previo al ingreso                                               | Información completa del proceso asistencial a pacientes y familiares<br>Valoración preoperatoria. Optimización Nutricional, cardiológica, anemia y comorbilidad si precisa.<br>Firma de consentimientos informados. Entrega de documentación.                                                                                                                                                                                                                                                                                                                                                                                                                                                                                                                                                                                                                                                                                                                                                                                                                                                                                                                                                                                                                                                                                                                                                                                                                                                                                                                                                                                              |
| Preoperatorio hospital o domicilio<br>Día previo a intervención | Dieta baja en residuos<br>Suplementos dietéticos<br>Iniciar profilaxis tromboembólica<br>Ayuno 6 horas sólido. 2 horas líquido claro                                                                                                                                                                                                                                                                                                                                                                                                                                                                                                                                                                                                                                                                                                                                                                                                                                                                                                                                                                                                                                                                                                                                                                                                                                                                                                                                                                                                                                                                                                        |
| Peroperatorio                                                   | <p><b>Preoperatorio</b><br/>Colocación de medias compresivas o de compresión neumática intermitente según riesgo tromboembólico.<br/>Enema de limpieza 7:00h (en resección recto-sigma en aquellos casos en que esté indicado)<br/>Suplemento de bebida carbohidratada 12.5% maltodextrinas 250cc 2 horas antes de intervención<br/>Administración profiláctica de antibiótico 1 hora antes de incisión quirúrgica cuando esté indicado</p> <p><b>Intraoperatorio</b><br/>Paciente en quirófano a las 8:00h<br/>Colocación de vía periférica<br/>Inserción de catéter epidural en cirugía abierta<br/>Inducción anestésica<br/>Oxigenación FiO2 0.6-0.8<br/>Optimización hemodinámica mediante FDO según protocolo<br/>Fluidoterapia en perfusión continua solución balanceada (3.5ml/kg/h laparoscopia, 7ml/kg/h laparotomía)<br/>Sondaje vesical<br/>Preferentemente cirugía laparoscópica mínimamente invasiva<br/>No SNG<br/>Calentamiento activo con manta térmica y calentador de fluidos<br/>Profilaxis NVPO según escala Apfel<br/>No drenajes<br/>Infiltración puertos laparoscopia o TAP según intervención. Anestesia epidural torácica en cirugía abierta</p> <p><b>Postoperatorio inmediato</b><br/>Mantenimiento activo de temperatura<br/>Mantenimiento de FiO2 0.5 2 horas tras fin intervención. Fisioterapia respiratoria (Inspiron 10/h)<br/>Analgesia pautada según intervención. Mínima administración de morfícos.<br/>Fluidoterapia restrictiva<br/>Inicio de tolerancia oral 6 horas tras cirugía<br/>Inicio de movilización a las 8 horas tras cirugía<br/>Profilaxis tromboembolismo enoxaparina 40 mg 22:00h</p> |
| 1º día postoperatorio                                           | <p>Suplementación nutricional en casos seleccionados<br/>Dieta normal según tolerancia<br/>Valorar retirada de drenajes si existen<br/>Movilización activa (cama/sillón/inicio deambulacion de 60 metros/4 veces/día)<br/>Analgesia endovenosa. No morfícos.<br/>Si tolerancia oral correcta retirada de líquidos endovenosos<br/>Retirada de sondaje vesical y catéter epidural si presenta<br/>Valorar controles analíticos de PCR y/o Procalcitonina (que se repetirá el 3º o 4º día según resultados)<br/>Administración de lactulosa 15ml/12h v.o.<br/>Cuidado de estoma si presenta</p>                                                                                                                                                                                                                                                                                                                                                                                                                                                                                                                                                                                                                                                                                                                                                                                                                                                                                                                                                                                                                                               |
| 2º día postoperatorio                                           | <p>Dieta semiblanda<br/>Movilización activa (deambulacion)<br/>Retirada de líquidos endovenosos. Retirada de drenajes si presenta<br/>Profilaxis tromboembolismo<br/>Profilaxis NVPO. Profilaxis antiulcerosa<br/>Cuidado estoma si presenta.</p>                                                                                                                                                                                                                                                                                                                                                                                                                                                                                                                                                                                                                                                                                                                                                                                                                                                                                                                                                                                                                                                                                                                                                                                                                                                                                                                                                                                           |
| 3º-4º-5º día postoperatorio                                     | <p>Dieta normal blanda<br/>Analgesia oral. Retirada de vía venosa<br/>Movilización activa (deambulacion)<br/>Profilaxis tromboembolismo<br/>Alta domiciliaria a partir de 4º día<br/>Cuidado estoma si presenta. Valorar control analítico de PCR y/o procalcitonina</p>                                                                                                                                                                                                                                                                                                                                                                                                                                                                                                                                                                                                                                                                                                                                                                                                                                                                                                                                                                                                                                                                                                                                                                                                                                                                                                                                                                    |
| 4º-5º día postoperatorio                                        | <p>Mantenimiento tromboprofilaxis 28 días tras cirugía<br/>Control telefónico tras alta<br/>Criterios generales de alta. No complicaciones quirúrgicas, no fiebre, dolor controlado con analgesia oral, deambulacion completa, aceptación por parte del paciente. Informa de recomendaciones.<br/>Seguimiento a 1, 3 y 6 meses tras alta</p>                                                                                                                                                                                                                                                                                                                                                                                                                                                                                                                                                                                                                                                                                                                                                                                                                                                                                                                                                                                                                                                                                                                                                                                                                                                                                                |

Tabla 2: Protocolo de consenso del Grupo Español de Rehabilitación Multimodal para Cirugía de Recto

| Tiempo                                                          | Protocolo                                                                                                                                                                                                                                                                                                                                                                                                                                                                                                                                                                                                                                                                                                                                                                                                                                                                                                                                                                                                                                                                                                                                                                                                                                                                                                                                                                                                                                                                                                                                                                                                                                                                                                                                                                                     |
|-----------------------------------------------------------------|-----------------------------------------------------------------------------------------------------------------------------------------------------------------------------------------------------------------------------------------------------------------------------------------------------------------------------------------------------------------------------------------------------------------------------------------------------------------------------------------------------------------------------------------------------------------------------------------------------------------------------------------------------------------------------------------------------------------------------------------------------------------------------------------------------------------------------------------------------------------------------------------------------------------------------------------------------------------------------------------------------------------------------------------------------------------------------------------------------------------------------------------------------------------------------------------------------------------------------------------------------------------------------------------------------------------------------------------------------------------------------------------------------------------------------------------------------------------------------------------------------------------------------------------------------------------------------------------------------------------------------------------------------------------------------------------------------------------------------------------------------------------------------------------------|
| Previo al ingreso                                               | <p>Información completa del proceso asistencial a pacientes y familiares</p> <p>Valoración preoperatoria. Optimización Nutricional, cardiológica, anemia y comorbilidad si precisa.</p> <p>Firma de consentimientos informados. Entrega de documentación. Remitir a consulta de estomaterapia si previsión de estoma</p> <p>Preparación intestinal: No se realiza en tumores de 1/3 superior, tumores no radiados y/o con pocas posibilidades de estoma ni en amputación abdominoperineal. Pacientes con tumores en 2/3 inferiores, elevada posibilidad de colonoscopia intraoperatoria y/o estoma si que requieren preparación intestinal.</p>                                                                                                                                                                                                                                                                                                                                                                                                                                                                                                                                                                                                                                                                                                                                                                                                                                                                                                                                                                                                                                                                                                                                               |
| Preoperatorio hospital o domicilio<br>Día previo a intervención | <p>Dieta baja en residuos</p> <p>Suplementos dietéticos</p> <p>Iniciar profilaxis tromboembólica</p> <p>Ayuno 6 horas sólido. 2 horas líquido claro</p> <p>Enema de limpieza: 2 enemas de limpieza 500 ml SF a las 16h y a las 20h</p> <p>Marcado de estoma</p> <p>Suplemento dietético a las 22:00</p>                                                                                                                                                                                                                                                                                                                                                                                                                                                                                                                                                                                                                                                                                                                                                                                                                                                                                                                                                                                                                                                                                                                                                                                                                                                                                                                                                                                                                                                                                       |
| Peroperatorio                                                   | <p><b>Preoperatorio</b></p> <p>Colocación de medias compresivas o de compresión neumática intermitente según riesgo tromboembólico.</p> <p>Suplemento de bebida carbohidratada 12.5% maltodextrinas 250cc 2 horas antes de intervención</p> <p>Administración profiláctica de antibiótico 1 hora antes de incisión quirúrgica cuando esté indicado</p> <p><b>Intraoperatorio</b></p> <p>Paciente en quirófano a las 8:00h</p> <p>Colocación de vía periférica</p> <p>Inserción de catéter epidural torácico T10-T12 en cirugía abierta</p> <p>Inducción anestésica</p> <p>Oxigenación FiO2 0.6-0.8</p> <p>Optimización hemodinámica mediante FDO según protocolo</p> <p>Fluidoterapia en perfusión continua solución balanceada (3.5ml/kg/h laparoscopia, 7ml/kg/h laparotomía)</p> <p>Sondaje vesical</p> <p>Preferentemente cirugía laparoscópica mínimamente invasiva. Incisiones de asistencia transversas o infraumbilicales</p> <p>Relajación neuromuscular profunda</p> <p>No SNG</p> <p>Calentamiento activo con manta térmica y calentador de fluidos</p> <p>Profilaxis NVPO según escala Apfel</p> <p>No drenajes, excepto en casos seleccionados (coleciones en pelvis)</p> <p>Infiltración puertos laparoscopia o TAP según intervención. Anestesia epidural torácica en cirugía abierta</p> <p><b>Postoperatorio inmediato</b></p> <p>Mantenimiento activo de temperatura</p> <p>Mantenimiento de FiO2 0.5 2 horas tras fin intervención. Fisioterapia respiratoria (Inspiron 10/h)</p> <p>Analgesia pauta según intervención. Mínima administración de morfícos.</p> <p>Fluidoterapia restrictiva</p> <p>Inicio de tolerancia oral 6 horas tras cirugía</p> <p>Inicio de movilización a las 8 horas tras cirugía</p> <p>Profilaxis tromboembolismo enoxaparina 40 mg 22:00h</p> |
| 1º día postoperatorio                                           | <p>Suplementación nutricional en casos seleccionados</p> <p>Dieta normal según tolerancia</p> <p>Valorar retirada de drenajes si existen</p> <p>Movilización activa (cama/sillón/inicio deambulacion de 60 metros/4 veces/día)</p> <p>Analgesia endovenosa. No morfícos.</p> <p>Si tolerancia oral correcta retirada de líquidos endovenosos</p> <p>Retirada de sondaje vesical y catéter epidural si presenta</p> <p>Valorar controles analíticos de PCR y/o Procalcitonina (que se repetirá el 3º o 4º día según resultados)</p> <p>Administración de lactulosa 15ml/12h v.o.</p> <p>Cuidado de estoma si presenta</p>                                                                                                                                                                                                                                                                                                                                                                                                                                                                                                                                                                                                                                                                                                                                                                                                                                                                                                                                                                                                                                                                                                                                                                      |
| 2º día postoperatorio                                           | <p>Dieta semiblanda</p> <p>Movilización activa (deambulacion)</p> <p>Retirada de líquidos endovenosos. Retirada de drenajes si presenta</p> <p>Profilaxis tromboembolismo</p> <p>Profilaxis NVPO. Profilaxis antiulcerosa</p> <p>Cuidado estoma si presenta.</p> <p>Control analítico de PCR y/o Procalcitonina</p>                                                                                                                                                                                                                                                                                                                                                                                                                                                                                                                                                                                                                                                                                                                                                                                                                                                                                                                                                                                                                                                                                                                                                                                                                                                                                                                                                                                                                                                                           |
| 3º-4º-5º día postoperatorio                                     | <p>Dieta normal blanda. Analgesia oral. Retirada de vía venosa</p> <p>Movilización activa (deambulacion)</p> <p>Profilaxis tromboembolismo</p> <p>Alta domiciliaria a partir de 4º día</p> <p>Cuidado estoma si presenta.</p> <p>Control analítico de PCR y/o procalcitonina</p>                                                                                                                                                                                                                                                                                                                                                                                                                                                                                                                                                                                                                                                                                                                                                                                                                                                                                                                                                                                                                                                                                                                                                                                                                                                                                                                                                                                                                                                                                                              |
| 4º-5º día postoperatorio                                        | <p>Mantenimiento tromboprofilaxis 28 días tras cirugía</p> <p>Control telefónico tras alta</p> <p>Criterios generales de alta. No complicaciones quirúrgicas, no fiebre, dolor controlado con analgesia oral, demabulación completa, aceptación por parte del paciente. Informa de recomendaciones.</p> <p>Seguimiento a 1, 3 y 6 meses tras alta</p>                                                                                                                                                                                                                                                                                                                                                                                                                                                                                                                                                                                                                                                                                                                                                                                                                                                                                                                                                                                                                                                                                                                                                                                                                                                                                                                                                                                                                                         |

Tabla 3: Protocolo de consenso del Grupo Español de Rehabilitación Multimodal para Cistectomía radical

| Tiempo                                                          | Protocolo                                                                                                                                                                                                                                                                                                                                                                                                                                                                                                                                                                                                                                                                                                                                                                                                                                                                                                                                                                                                                                                                                                                                                                                                                                                                                                                                                                                                                                                                                                                                                                                                                                                                                                                         |
|-----------------------------------------------------------------|-----------------------------------------------------------------------------------------------------------------------------------------------------------------------------------------------------------------------------------------------------------------------------------------------------------------------------------------------------------------------------------------------------------------------------------------------------------------------------------------------------------------------------------------------------------------------------------------------------------------------------------------------------------------------------------------------------------------------------------------------------------------------------------------------------------------------------------------------------------------------------------------------------------------------------------------------------------------------------------------------------------------------------------------------------------------------------------------------------------------------------------------------------------------------------------------------------------------------------------------------------------------------------------------------------------------------------------------------------------------------------------------------------------------------------------------------------------------------------------------------------------------------------------------------------------------------------------------------------------------------------------------------------------------------------------------------------------------------------------|
| Previo al ingreso                                               | <p>Información completa del proceso asistencial a pacientes y familiares</p> <p>Valoración preoperatoria. Optimización Nutricional, cardiológica, anemia y comorbilidad si precisa.</p> <p>Evitar en lo posible dieta rica en fibra/residuos</p> <p>Firma de consentimientos informados. Entrega de documentación. Remitir a consulta de estomaterapia si previsión de estoma</p>                                                                                                                                                                                                                                                                                                                                                                                                                                                                                                                                                                                                                                                                                                                                                                                                                                                                                                                                                                                                                                                                                                                                                                                                                                                                                                                                                 |
| Preoperatorio hospital o domicilio<br>Día previo a intervención | <p>Dieta baja en residuos</p> <p>Suplementos dietéticos</p> <p>Iniciar profilaxis tromboembólica</p> <p>Ayuno 6 horas sólido. 2 horas líquido claro</p> <p>Enema de limpieza: 2 enemas de limpieza 500 ml SF a las 16h y a las 20h</p> <p>Markado de estoma</p> <p>Suplemento dietético a las 22:00</p>                                                                                                                                                                                                                                                                                                                                                                                                                                                                                                                                                                                                                                                                                                                                                                                                                                                                                                                                                                                                                                                                                                                                                                                                                                                                                                                                                                                                                           |
| Peroperatorio                                                   | <p><b>Preoperatorio</b></p> <p>Colocación de medias compresivas o de compresión neumática intermitente según riesgo tromboembólico.</p> <p>Suplemento de bebida carbohidratada 12.5% maltodextrinas 250cc 2 horas antes de intervención</p> <p>Administración profiláctica de antibiótico 1 hora antes de incisión quirúrgica cuando esté indicado</p> <p><b>Intraoperatorio</b></p> <p>Paciente en quirófano a las 8:00h</p> <p>Colocación de vía periférica</p> <p>Inserción de catéter epidural torácico T7-T10. Iniciar anestesia epidural tras inducción e iniciar perfusión continua una hora después del inicio</p> <p>Inducción anestésica</p> <p>Oxigenación FiO2 0.6-0.8</p> <p>Optimización hemodinámica mediante FDO según protocolo</p> <p>Fluidoterapia en perfusión continua solución balanceada (3.5ml/kg/h laparoscopia, 7ml/kg/h laparotomía)</p> <p>Sondaje vesical</p> <p>No SNG</p> <p>Calentamiento activo con manta térmica y calentador de fluidos</p> <p>Profilaxis NVPO según escala Apfel</p> <p>Acceso quirúrgico mínimamente invasivo</p> <p>Evitar manipulación intestinal</p> <p><b>Postoperatorio inmediato</b></p> <p>Mantenimiento activo de temperatura</p> <p>Mantenimiento de FiO2 0.5 2 horas tras fin intervención. Fisioterapia respiratoria (Inspiron 10/h)</p> <p>Analgesia pautada según intervención. Mínima administración de morfícos.</p> <p>Fluidoterapia dirigida a objetivos o restrictiva si no estuviera disponible</p> <p>Inicio de tolerancia oral 6 horas tras cirugía</p> <p>Inicio de movilización a las 8 horas tras cirugía</p> <p>Administración de procinéticos: metoclopramida 100 mg/8h + Lactulosa</p> <p>Profilaxis tromboembolismo enoxaparina 40 mg 22:00h</p> |
| 1º día postoperatorio                                           | <p>Suplementación nutricional en casos seleccionados</p> <p>Dieta líquida según tolerancia</p> <p>Profilaxis antiulcerosa</p> <p>Movilización activa (cama/sillón/inicio deambulacion de 60 metros/4 veces/día)</p> <p>Analgesia endovenosa y epidural. No morfícos.</p> <p>Comprobación exhaustiva de permeabilidad de sonda uretral (en neovejiga) y catéteres ureterales.</p> <p>Controles analíticos de PCR y/o Procalcitonina</p> <p>Administración de lactulosa 15ml/12h v.o.</p> <p>Cuidado de estoma si presenta</p>                                                                                                                                                                                                                                                                                                                                                                                                                                                                                                                                                                                                                                                                                                                                                                                                                                                                                                                                                                                                                                                                                                                                                                                                      |
| 2º día postoperatorio                                           | <p>Progresión dieta según tolerancia. Analgesia endovenosa y epidural.</p> <p>Movilización activa (deambulacion)</p> <p>Fisioterapia respiratoria</p> <p>Valorar retirada de líquidos endovenosos. Valorar retirada de drenajes si presenta</p> <p>Profilaxis tromboembolismo</p> <p>Profilaxis NVPO. Profilaxis antiulcerosa</p> <p>Cuidado estoma si presenta.</p> <p>Control analítico de PCR y/o Procalcitonina</p>                                                                                                                                                                                                                                                                                                                                                                                                                                                                                                                                                                                                                                                                                                                                                                                                                                                                                                                                                                                                                                                                                                                                                                                                                                                                                                           |
| 3º-4º-5º día postoperatorio                                     | <p>Progresión en dieta según tolerancia (Estudio nutricional si no tolerancia)</p> <p>Retirada catéter epidural. Analgesia oral. Retirada de vía venosa</p> <p>Movilización activa (deambulacion)</p> <p>Profilaxis tromboembolismo. Profilaxis antiulcerosa.</p> <p>Iniciar plan de alta.</p> <p>Cuidado estoma si presenta.</p> <p>Control analítico de PCR y/o procalcitonina</p>                                                                                                                                                                                                                                                                                                                                                                                                                                                                                                                                                                                                                                                                                                                                                                                                                                                                                                                                                                                                                                                                                                                                                                                                                                                                                                                                              |
| Día de alta                                                     | <p>Mantenimiento tromboprofilaxis 28 días tras cirugía</p> <p>Criterios generales de alta. No complicaciones quirúrgicas, no fiebre, dolor controlado con analgesia oral, demabulación completa, aceptación por parte del paciente.</p> <p>Informa de recomendaciones.</p> <p>Alta con sonda (en neovejiga) y catéteres ureterales si lleva.</p> <p>Seguimiento a 1, 3 y 6 meses tras alta</p>                                                                                                                                                                                                                                                                                                                                                                                                                                                                                                                                                                                                                                                                                                                                                                                                                                                                                                                                                                                                                                                                                                                                                                                                                                                                                                                                    |

Tabla 4: : Protocolo de consenso del Grupo Español de Rehabilitación Multimodal para Cirugía Bariátrica

| Tiempo                                                          | Protocolo                                                                                                                                                                                                                                                                                                                                                                                                                                                                                                                                                                                                                                                                                                                                                                                                                                                                                                                                                                                                                                                                                                                                                                                                                                                                                                                                                                                                                                                                                                                                                                                                                                                                                                                                                                                                                                                                                                                                                                                     |
|-----------------------------------------------------------------|-----------------------------------------------------------------------------------------------------------------------------------------------------------------------------------------------------------------------------------------------------------------------------------------------------------------------------------------------------------------------------------------------------------------------------------------------------------------------------------------------------------------------------------------------------------------------------------------------------------------------------------------------------------------------------------------------------------------------------------------------------------------------------------------------------------------------------------------------------------------------------------------------------------------------------------------------------------------------------------------------------------------------------------------------------------------------------------------------------------------------------------------------------------------------------------------------------------------------------------------------------------------------------------------------------------------------------------------------------------------------------------------------------------------------------------------------------------------------------------------------------------------------------------------------------------------------------------------------------------------------------------------------------------------------------------------------------------------------------------------------------------------------------------------------------------------------------------------------------------------------------------------------------------------------------------------------------------------------------------------------|
| Previo al ingreso                                               | <p>Información completa del proceso asistencial a pacientes y familiares</p> <p>Valoración preoperatoria. Optimización Nutricional, cardiológica, anemia y comorbilidad si precisa.</p> <p>Firma de consentimientos informados. Entrega de documentación.</p> <p>AG: Perfil glucémico, lipídico, férrico. Realización de gasometría arterial basal.</p> <p>Derivación a consulta de endocrinología.</p> <p>Derivación a estudio polisomniográfico para control y/o diagnóstico de SAOS. Iniciar tratamiento con CPAP al menos 4-6 semanas antes de intervención.</p> <p>Dieta hipocalórica (800 Kcal/día) y suplementación nutricional 2-4 semanas previas a intervención</p> <p>Se aconseja pérdida de 10% de peso previo a la intervención.</p>                                                                                                                                                                                                                                                                                                                                                                                                                                                                                                                                                                                                                                                                                                                                                                                                                                                                                                                                                                                                                                                                                                                                                                                                                                             |
| Preoperatorio hospital o domicilio<br>Día previo a intervención | <p>Suplementos dietéticos</p> <p>Iniciar profilaxis tromboembólica</p> <p>Ayuno 6 horas sólido. 2 horas líquido claro. Iniciar fluidoterapia con SG tras la cena y hasta la intervención.</p> <p>Evitar ansiolíticos.</p>                                                                                                                                                                                                                                                                                                                                                                                                                                                                                                                                                                                                                                                                                                                                                                                                                                                                                                                                                                                                                                                                                                                                                                                                                                                                                                                                                                                                                                                                                                                                                                                                                                                                                                                                                                     |
| Peroperatorio                                                   | <p><b>Preoperatorio</b></p> <p>Colocación de medias compresivas o de compresión neumática intermitente según riesgo tromboembólico.</p> <p>Administración profiláctica de antibiótico 1 hora antes de incisión quirúrgica cuando esté indicado</p> <p><b>Intraoperatorio</b></p> <p>Paciente en quirófano a las 8:00h</p> <p>Mesa quirúrgica adecuada al peso del paciente. Almohadillado exhaustivo.</p> <p>Colocación de vía periférica</p> <p>Administración de profilaxis nti-reflujo (metoclopramida o ranitidina 30 minutos antes de inducción anestésica)</p> <p>Valoración individualizada de inserción de catéter epidural torácico previa a inducción anestésica.</p> <p>Inducción anestésica</p> <p>Medidas habituales para IOT en paciente con vía aérea difícil. IOT con inducción de scuencal rápida.</p> <p>Realización de maniobras de reclutamiento alveolar tras IOT. Vt = 6-8 ml/kg peso ideal. PEEP = 10-15 cmH2O</p> <p>Oxigenación FiO2 0.6-0.8</p> <p>Optimización hemodinámica mediante FDO según protocolo</p> <p>Fluidoterapia en perfusión continua solución balanceada (3.5ml/kg/h laparoscopia, 7ml/kg/h laparotomía)</p> <p>Analgesia mediante catéter epidural o mediante perfusión continua de remifentanilo</p> <p>Bloqueo neuromuscular profundo</p> <p>Sondaje vesical</p> <p>No SNG</p> <p>Calentamiento activo con manta térmica y calentador de fluidos</p> <p>Profilaxis NVPO según escala Apfel</p> <p><b>Postoperatorio inmediato</b></p> <p>Mantenimiento activo de temperatura</p> <p>Mantenimiento de FiO2 0.5 2 horas tras fin intervención. Fisioterapia respiratoria (Inspiron 10/h)</p> <p>Elevación cama a 90 grados.</p> <p>Analgesia pautada epidural en perfusión continua si presenta. Evitar administración de mórficos.</p> <p>Fluidoterapia restrictiva</p> <p>Inicio de tolerancia oral 6 horas tras cirugía</p> <p>Inicio de movilización a las 8 horas tras cirugía</p> <p>Profilaxis tromboembolismo enoxaparina 40 mg 22:00h</p> |
| 1º día postoperatorio                                           | <p>Dieta: Iniciar lo antes posible fórmulas de nutrición enteral completas hipocalóricas e hiperprotéicas</p> <p>Valorar retirada de drenajes si existen</p> <p>Movilización activa (cama/sillón/inicio deambulacion de 60 metros/4 veces/día)</p> <p>Analgesia endovenosa y epidural si presenta.</p> <p>Si tolerancia oral correcta retirada de líquidos endovenosos</p> <p>Retirada de sondaje vesical</p> <p>Control débito de drenajes si presenta</p> <p>Controles analíticos de PCR y/o Procalcitonina</p>                                                                                                                                                                                                                                                                                                                                                                                                                                                                                                                                                                                                                                                                                                                                                                                                                                                                                                                                                                                                                                                                                                                                                                                                                                                                                                                                                                                                                                                                             |
| 2º día postoperatorio                                           | <p>Dieta: Iniciar lo antes posible fórmulas de nutrición enteral completas hipocalóricas e hiperprotéicas</p> <p>Movilización activa (deambulacion)</p> <p>Fisioterapia respiratoria. Inicio de analgesia oral.</p> <p>Retirada de líquidos endovenosos. Retirada de drenajes si presenta. Retirada de catéter epidural si presenta.</p> <p>Profilaxis tromboembolismo</p> <p>Profilaxis NVPO. Profilaxis antiulcerosa</p> <p>Controles analíticos de PCR y/o Procalcitonina</p> <p>Valorar alta hospitalaria:</p> <p>Mantenimiento tromboprofilaxis 28 días tras cirugía</p> <p>Control telefónico tras alta: Control en la consulta a los 15 días de alta.</p> <p>Recomendaciones nutricionales: dieta líquida hipocalórica e hiperprotéica los 15 primeros días tras alta rica en fibra.</p> <p>Tomas fraccionadas.</p> <p>Criterios generales de alta. No complicaciones quirúrgicas, no fiebre, dolor controlado con analgesia oral, deambulacion completa, aceptacion por parte del paciente. Informa de recomendaciones.</p> <p>Seguimiento a 1, 3 y 6 meses tras alta</p>                                                                                                                                                                                                                                                                                                                                                                                                                                                                                                                                                                                                                                                                                                                                                                                                                                                                                                             |

Tabla 5: : Protocolo de consenso del Grupo Español de Rehabilitación Multimodal para Cirugía Hepática

| Tiempo                                                          | Protocolo                                                                                                                                                                                                                                                                                                                                                                                                                                                                                                                                                                                                                                                                                                                                                                                                                                                                                                                                                                                                                                                                                                                                                                                                                                                                                                                                                                                                                                                                                                                                                                                                                                                                                                  |
|-----------------------------------------------------------------|------------------------------------------------------------------------------------------------------------------------------------------------------------------------------------------------------------------------------------------------------------------------------------------------------------------------------------------------------------------------------------------------------------------------------------------------------------------------------------------------------------------------------------------------------------------------------------------------------------------------------------------------------------------------------------------------------------------------------------------------------------------------------------------------------------------------------------------------------------------------------------------------------------------------------------------------------------------------------------------------------------------------------------------------------------------------------------------------------------------------------------------------------------------------------------------------------------------------------------------------------------------------------------------------------------------------------------------------------------------------------------------------------------------------------------------------------------------------------------------------------------------------------------------------------------------------------------------------------------------------------------------------------------------------------------------------------------|
| Previo al ingreso                                               | <p>Información completa del proceso asistencial a pacientes y familiares</p> <p>Valoración preoperatoria. Optimización Nutricional, cardiológica, anemia y comorbilidad si precisa.</p> <p>Evitar en lo posible dieta rica en fibra/residuos</p> <p>Firma de consentimientos informados. Entrega de documentación.</p>                                                                                                                                                                                                                                                                                                                                                                                                                                                                                                                                                                                                                                                                                                                                                                                                                                                                                                                                                                                                                                                                                                                                                                                                                                                                                                                                                                                     |
| Preoperatorio hospital o domicilio<br>Día previo a intervención | <p>Suplementos dietéticos</p> <p>Iniciar profilaxis tromboembólica</p> <p>Ayuno 6 horas sólido. 2 horas líquido claro</p> <p>Suplemento dietético a las 22:00h</p>                                                                                                                                                                                                                                                                                                                                                                                                                                                                                                                                                                                                                                                                                                                                                                                                                                                                                                                                                                                                                                                                                                                                                                                                                                                                                                                                                                                                                                                                                                                                         |
| Peroperatorio                                                   | <p><b>Preoperatorio</b></p> <p>Colocación de medias compresivas o de compresión neumática intermitente según riesgo tromboembólico.</p> <p>Suplemento de bebida carbohidratada 12.5% maltodextrinas 250cc 2 horas antes de intervención</p> <p>Administración profiláctica de antibiótico 1 hora antes de incisión quirúrgica cuando esté indicado</p> <p><b>Intraoperatorio</b></p> <p>Paciente en quirófano a las 8:00h</p> <p>Colocación de vía periférica</p> <p>Inserción de catéter epidural T6-T8. Iniciar anestesia epidural tras inducción e iniciar perfusión continua una hora después del inicio de la intervención.</p> <p>Inducción anestésica</p> <p>Oxigenación FiO2 0.6-0.8</p> <p>Optimización hemodinámica mediante FDO según protocolo</p> <p>Fluidoterapia en perfusión continua solución balanceada (3.5ml/kg/h laparoscopia, 7ml/kg/h laparotomía)</p> <p>Sondaje vesical</p> <p>No SNG</p> <p>Calentamiento activo con manta térmica y calentador de fluidos</p> <p>Profilaxis NVPO según escala Apfel</p> <p>No drenajes, salvo casos seleccionados (infección sitio quirúrgico, biliostasis incorrecta, anastomosis bilio-entérica).</p> <p>Evitar manipulación intestinal.</p> <p><b>Postoperatorio inmediato</b></p> <p>Mantenimiento activo de temperatura</p> <p>Mantenimiento de FiO2 0.5 2 horas tras fin intervención. Fisioterapia respiratoria (Inspiron 10/h)</p> <p>Analgesia pauta epidural en perfusión continua. Mínima administración de morfícos.</p> <p>Fluidoterapia restrictiva</p> <p>Inicio de tolerancia oral 6 horas tras cirugía</p> <p>Inicio de movilización a las 8 horas tras cirugía</p> <p>Profilaxis tromboembolismo enoxaparina 40 mg 22:00h</p> |
| 1º día postoperatorio                                           | <p>Suplementación nutricional en casos seleccionados. Administración de suplementos proteicos (2).</p> <p>Dieta normal según tolerancia</p> <p>Valorar retirada de drenajes si existen</p> <p>Movilización activa (cama/sillón/inicio deambulacion de 60 metros/4 veces/día)</p> <p>Analgesia endovenosa y epidural. (evitar morfícos iv y/o orales).</p> <p>Si tolerancia oral correcta retirada de líquidos endovenosos</p> <p>Retirada de sondaje vesical.</p> <p>Control débito de drenajes si presenta.</p> <p>Controles analíticos de PCR y/o Procalcitonina</p>                                                                                                                                                                                                                                                                                                                                                                                                                                                                                                                                                                                                                                                                                                                                                                                                                                                                                                                                                                                                                                                                                                                                     |
| 2º día postoperatorio                                           | <p>Dieta semiblanda. Administración de suplementos proteicos</p> <p>Movilización activa (deambulacion)</p> <p>Fisioterapia respiratoria</p> <p>Retirada de líquidos endovenosos. Retirada de drenajes si presenta</p> <p>Profilaxis tromboembolismo</p> <p>Profilaxis NVPO. Profilaxis antiulcerosa</p> <p>Controles analíticos de PCR y/o Procalcitonina.</p>                                                                                                                                                                                                                                                                                                                                                                                                                                                                                                                                                                                                                                                                                                                                                                                                                                                                                                                                                                                                                                                                                                                                                                                                                                                                                                                                             |
| 3º-4º-5º día postoperatorio                                     | <p>Dieta normal blanda</p> <p>Retirada de catéter epidural</p> <p>Analgesia oral. Retirada de vía venosa</p> <p>Movilización activa (deambulacion)</p> <p>Profilaxis tromboembolismo</p> <p>Alta domiciliaria a partir de 4º día</p> <p>Controles analíticos de PCR y/o Procalcitonina.</p>                                                                                                                                                                                                                                                                                                                                                                                                                                                                                                                                                                                                                                                                                                                                                                                                                                                                                                                                                                                                                                                                                                                                                                                                                                                                                                                                                                                                                |
| 4º-5º día postoperatorio                                        | <p>Mantenimiento trombopprofilaxis 28 días tras cirugía</p> <p>Control telefónico tras alta</p> <p>Criterios generales de alta. No complicaciones quirúrgicas, no fiebre, dolor controlado con analgesia oral, demambulacion completa, aceptación por parte del paciente. Informa de recomendaciones.</p> <p>Seguimiento a 1, 3 y 6 meses tras alta</p>                                                                                                                                                                                                                                                                                                                                                                                                                                                                                                                                                                                                                                                                                                                                                                                                                                                                                                                                                                                                                                                                                                                                                                                                                                                                                                                                                    |

Tabla 6: Protocolo de consenso del Grupo Español de Rehabilitación Multimodal para Cirugía Torácica

| Tiempo                                                          | Protocolo                                                                                                                                                                                                                                                                                                                                                                                                                                                                                                                                                                                                                                                                                                                                                                                                                                                                                                                                                                                                                                                                                                                                                                                                                                                                                                                                                                                                                                                                                                                                                                                                                                                                                                                     |
|-----------------------------------------------------------------|-------------------------------------------------------------------------------------------------------------------------------------------------------------------------------------------------------------------------------------------------------------------------------------------------------------------------------------------------------------------------------------------------------------------------------------------------------------------------------------------------------------------------------------------------------------------------------------------------------------------------------------------------------------------------------------------------------------------------------------------------------------------------------------------------------------------------------------------------------------------------------------------------------------------------------------------------------------------------------------------------------------------------------------------------------------------------------------------------------------------------------------------------------------------------------------------------------------------------------------------------------------------------------------------------------------------------------------------------------------------------------------------------------------------------------------------------------------------------------------------------------------------------------------------------------------------------------------------------------------------------------------------------------------------------------------------------------------------------------|
| Previo al ingreso                                               | Valoración preoperatoria. Optimización Nutricional, cardiológica, anemia y comorbilidad si precisa.<br>Abstención tabaco. Recomendación de fisioterapia respiratoria y uso de broncodilatadores si EPOC o hiperreactividad bronquial. Firma de consentimientos informados. Entrega de documentación.                                                                                                                                                                                                                                                                                                                                                                                                                                                                                                                                                                                                                                                                                                                                                                                                                                                                                                                                                                                                                                                                                                                                                                                                                                                                                                                                                                                                                          |
| Preoperatorio hospital o domicilio<br>Día previo a intervención | Fisioterapia respiratoria<br>Suplementos dietéticos<br>Iniciar profilaxis tromboembólica<br>Ayuno 6 horas sólido. 2 horas líquido claro<br>Suplemento dietético a las 22:00h                                                                                                                                                                                                                                                                                                                                                                                                                                                                                                                                                                                                                                                                                                                                                                                                                                                                                                                                                                                                                                                                                                                                                                                                                                                                                                                                                                                                                                                                                                                                                  |
| Peroperatorio                                                   | <p><b>Preoperatorio</b><br/>Colocación de medias compresivas o de compresión neumática intermitente según riesgo tromboembólico.<br/>Suplemento de bebida carbohidratada 12.5% maltodextrinas 250cc 2 horas antes de intervención<br/>Administración profiláctica de antibiótico 1 hora antes de incisión quirúrgica cuando esté indicado</p> <p><b>Intraoperatorio</b><br/>Paciente en quirófano a las 8:00h<br/>Colocación de vía periférica<br/>Inserción de catéter epidural T5-T6 o analgesia paravertebral. Iniciar anestesia epidural/paravertebral tras inducción e iniciar perfusión continua una hora después del inicio de la intervención.<br/>Inducción anestésica<br/>Ventilación protectora (Vt 6 ml/kg, PEEP&gt;5 durante la ventilación unipulmonar. Maniobras de reclutamiento alveolar al menos antes de ventilación unipulmonar y tras esta.<br/>Fluidoterapia restrictiva en perfusión continua solución balanceada (2 ml/kg/h)<br/>Sondaje vesical<br/>No hay indicación de SNG<br/>Calentamiento activo con manta térmica y calentador de fluidos<br/>Profilaxis NVPO según escala Apfel</p> <p><b>Postoperatorio inmediato</b><br/>Mantenimiento activo de temperatura<br/>Analgesia epidural/paravertebral. Mínima administración de morfícos.<br/>Fluidoterapia restrictiva<br/>Broncodilatadores en pacientes subsidiarios<br/>Sistema de drenaje torácico a aspiración negativa.<br/>Comprobación radiológica<br/>Inicio de tolerancia oral 6 horas tras cirugía<br/>Inicio de movilización a las 8 horas tras cirugía<br/>Retirada de fluidoterapia intravenosa al alta a planta<br/>Retirada de sondaje vesical al alta a planta</p> <p>Profilaxis tromboembolismo enoxaparina 40 mg 22:00h</p> |
| 1º día postoperatorio                                           | <p>Suplementación nutricional en casos seleccionados.<br/>Dieta líquida según tolerancia<br/>Valorar retirada de drenaje torácico<br/>Movilización activa (cama/sillón/inicio deambulacion de 60 metros/4 veces/día)<br/>Analgesia epidural/paravertebral. (No morfícos).<br/>Si tolerancia oral correcta retirada de líquidos endovenosos<br/>Retirada de sondaje vesical.<br/>Control débito de drenajes si presenta.<br/>Controles analíticos de PCR y/o Procalcitonina</p>                                                                                                                                                                                                                                                                                                                                                                                                                                                                                                                                                                                                                                                                                                                                                                                                                                                                                                                                                                                                                                                                                                                                                                                                                                                |
| 2º día postoperatorio                                           | <p>Dieta normal<br/>Movilización activa (deambulacion)<br/>Retirada de analgesia epidural/paravertebral<br/>Retirada de drenaje torácico<br/>RX comprobación<br/>Fisioterapia respiratoria<br/>Profilaxis tromboembolismo</p>                                                                                                                                                                                                                                                                                                                                                                                                                                                                                                                                                                                                                                                                                                                                                                                                                                                                                                                                                                                                                                                                                                                                                                                                                                                                                                                                                                                                                                                                                                 |
| 3º día postoperatorio                                           | <p>Dieta normal<br/>Analgesia oral.<br/>Movilización activa (deambulacion)<br/>Rx de comprobación<br/>Comprobación analítica<br/>Profilaxis tromboembolismo<br/>Control telefónico tras alta<br/>Criterios generales de alta. No complicaciones quirúrgicas, control radiológico con correcta reexpansión pulmonar, función cardiorrespiratoria correcta, no fiebre, dolor controlado con analgesia oral, demabulación completa, aceptación por parte del paciente.<br/>Seguimiento a 1, 3 y 6 meses tras alta</p>                                                                                                                                                                                                                                                                                                                                                                                                                                                                                                                                                                                                                                                                                                                                                                                                                                                                                                                                                                                                                                                                                                                                                                                                            |

## Material suplementario: Ejemplo de Documento de Información al Paciente que va a ser sometido a Recuperación Intensificada de Cirugía Abdominal.

### INTRODUCCION AL PROGRAMA

Este programa de recuperación intensificada de cirugía abdominal llamado RICA en el que usted participa con motivo de su intervención es diferente al tratamiento tradicional, consiste en la aplicación de una serie de medidas para minimizar el impacto y la repercusión orgánica que implica toda intervención quirúrgica, reduce las posibles complicaciones, agiliza la recuperación y puede incluso reducir la estancia hospitalaria.

Su colaboración activa como paciente y la de sus familiares o cuidadores, así como el cumplimiento de todas sus fases, es fundamental para el buen funcionamiento y el éxito de este Programa.

Existen tres etapas principales:

- Preparación previa al ingreso
- Durante su estancia en el hospital
- Recomendaciones al alta

El equipo multidisciplinar que le atenderá a lo largo de este programa, está entrenado para resolver todas sus dudas y guiarle en el desarrollo de cada fase del Programa.

### PREPARACION PREVIA AL INGRESO

La preparación previa del paciente es fundamental y asegura que el paciente se encuentre en las mejores condiciones posibles, identificando los riesgos personales en el preoperatorio

Usted visitará las consultas de cirugía, anestesia y enfermería para recibir toda la información necesaria acerca de los detalles de su intervención y las tareas que requieren de su colaboración previa en este programa.

A continuación le señalamos sus objetivos más inmediatos y previos al día del ingreso:

Si fuma, abandone el consumo de tabaco. Es importante que entienda que todo el esfuerzo que pueda dedicar a disminuir el consumo de tabaco, revertirá directamente en una disminución de las posibles complicaciones respiratorias que pueda sufrir durante el proceso quirúrgico. Si lo necesita, en su centro de salud le informarán acerca de los programas de apoyo para dejar de fumar

Ejercicios de fisioterapia respiratoria, con la cirugía puede aumentar el riesgo de presentar complicaciones respiratorias, para prevenirlas su enfermera le enseñará a trabajar su musculatura respiratoria con el uso del inspirómetro incentivador, además de los ejercicios que deberá de realizar con esta herramienta los días previos a la cirugía.

Nutrición preoperatoria, durante la cirugía se va a requerir un alto gasto energético y será muy importante el estado nutricional previo del paciente para favorecer la cicatrización y la defensa del organismo ante las infecciones.

Para lograr un mejor estado nutricional preoperatorio, proponemos seguir una dieta hipercalórica y más rica en proteínas, además de una correcta hidratación.

Al menos los diez días previos a la cirugía debe seguir una dieta rica en proteínas, evitando cocinar con grasas.

Los dos días previos a la cirugía llevará una dieta pobre en residuos para tener menos heces en su intestino

La noche antes de la intervención, podrá tomar alimentos hasta seis horas antes de la cirugía. En la consulta le entregarán unas bebidas ricas en hidratos de carbono específicas para pacientes que se van a someter a una cirugía, con la finalidad de reforzar su estatus nutricional. La pauta que deberá seguir para la toma de estas bebidas es la siguiente:

- El día anterior a la cirugía se tomará cuatro bricks.
- En la mañana de la cirugía se tomará dos bricks que deberá de haber terminado dos horas antes de la operación.
- No podrá tomar nada dos horas antes de la cirugía.

No debe tomar bebidas alcohólicas, el alcohol está relacionado con complicaciones postoperatorias

Ejercicio previo a la cirugía, el ejercicio físico moderado practicado antes de su ingreso contribuirá favorablemente en su recuperación posterior. Su enfermera le asesorará que tipo de actividad puede practicar dependiendo de su estado físico.

#### DURANTE SU ESTANCIA EN EL HOSPITAL

Después de la cirugía el equipo de profesionales que le atenderá le irá indicando cuales deben de ser los pasos de su recuperación día a día. Recuerde que su colaboración e implicación es clave en el adecuado progreso de su evolución.

Para ayudar a prevenir las posibles complicaciones características de toda cirugía trabajaremos tres campos fundamentales:

1. Movilización precoz
2. Nutrición temprana
3. Ejercicios de fisioterapia respiratoria

#### MOVILIZACION PRECOZ

Este es un punto importante y diferente con respecto al manejo del postoperatorio en las cirugías tradicionales. En este programa usted podrá levantarse después de la operación y caminar antes de lo habitual. Su progresión ideal sería la siguiente:

Día de la intervención, el personal de Enfermería le ayudará a incorporarse de la cama para sentarse en su sillón. Debería tratar de permanecer sentado fuera de la cama hasta dos horas

Al día siguiente de la intervención, podrá permanecer sentado a intervalos en el sillón hasta seis horas, además de caminar distancias cortas, alrededor de cuatro series de 60 metros.

Los días sucesivos continuará caminando intentando una progresión constante. intestino durante un tiempo variable que se puede acortar si se levanta y camina después de la intervención y se alarga si permanece acostado.

La cirugía paraliza

#### NUTRICION TEMPRANA

Uno de los principios básicos de este programa es el inicio de la tolerancia precoz; pero como norma general, el paciente debe establecer el ritmo siempre y cuando lo tolere de forma adecuada.

El mismo día de la intervención, al salir de quirófano, es importante que beba, salvo que se encuentre mal. Intente beber alrededor de cinco vasos de líquido. Le darán bebidas energéticas una vez que se haya levantado al sillón.

Al día siguiente de la intervención, aumentará la ingesta de líquido hasta 1litro y medio. Debe evitar las bebidas gaseosas. Las bebidas hiperproteicas que le suministran le ayudan a recuperarse del stress quirúrgico que supone una cirugía, además de contribuir a una mejor cicatrización de las heridas. Intente tomar al menos 3 bebidas hiperproteicas al día.

Los días sucesivos si está tolerando bien los líquidos, irá evolucionando a una dieta más sólida. Es más aconsejado que tome pequeñas cantidades de alimento varias veces durante el día más que grandes cantidades, le sentarán mejor. Si nota malestar o nauseas, descanse durante un par de horas y vuelva a intentarlo.

Continúe bebiendo líquidos de manera abundante.

#### EJERCICIOS DE FISIOTERAPIA RESPIRATORIA

En toda cirugía el riesgo de complicaciones respiratorias aumenta debido al reposo en cama, las molestias en el lugar de la incisión y otros factores. El riesgo se puede prevenir mediante ejercicios de movilización del



tórax, que realizará con el inspirómetro incentivador.

Con el uso constante del incentivador podrá:

- Aumentar la ventilación alveolar previniendo las neumonías.
- Aumentar la fuerza de la musculatura respiratoria.
- Aumentar el volumen pulmonar
- Movilizar secreciones

Aproximadamente a las 4-6 hrs después de la intervención podrá empezar a usar el incentivador. La frecuencia de uso será cada 2 hrs durante 10 minutos en cada ocasión. Vaya aumentando el volumen del inspirómetro progresivamente a modo de entrenamiento.

Si tiene cualquier duda en el manejo, consulte con el personal sanitario.

#### RECOMENDACIONES AL ALTA

El alto nivel de planificación que hay detrás de un RICA significa que todo el apoyo práctico que usted va a necesitar en casa debe estar preparado.

La planificación prevista para usted será revisada y validada por los médicos y enfermeras responsables de su alta hospitalaria.

Posiblemente su fecha de alta probable se le habrá comunicado con antelación por parte de su médico, esto facilita que usted pueda tener preparado todo lo necesario para irse a su domicilio, o centro asistencial si lo requiere, con tiempo suficiente.

El equipo de seguimiento del programa RICA le facilitará un teléfono de contacto para que pueda consultar cualquier duda que tenga durante las primeras 24 horas de alta.

El equipo de seguimiento informará a su centro de salud (vía mail o tfno.) de su alta a domicilio para que le realicen un seguimiento en las próximas 48 hrs.

Su alta hospitalaria está basada en criterios y objetivos específicos que cuando usted los cumpla podrá ser dado de alta.

Estos criterios son:

- Control efectivo del dolor con analgésicos orales.
- Buena tolerancia oral a líquidos y dieta, sin náuseas ni vómitos.
- Autonomía en la movilidad.
- Programa de enseñanza de manejo de la ostomía completado.

Si necesita ampliar más información, no dude en consultar con su médico o la Enfermera de la Unidad.
